# Supplementary material for: Self-Reported Medication Adherence Measured with Morisky Scales in Rare Disease Patients: A Systematic Review and Meta-Analysis
Source: MDPI journal article supplement (doi:10.3390/healthcare11111609), 2023-05-31
Supplement: s1 [file s1]

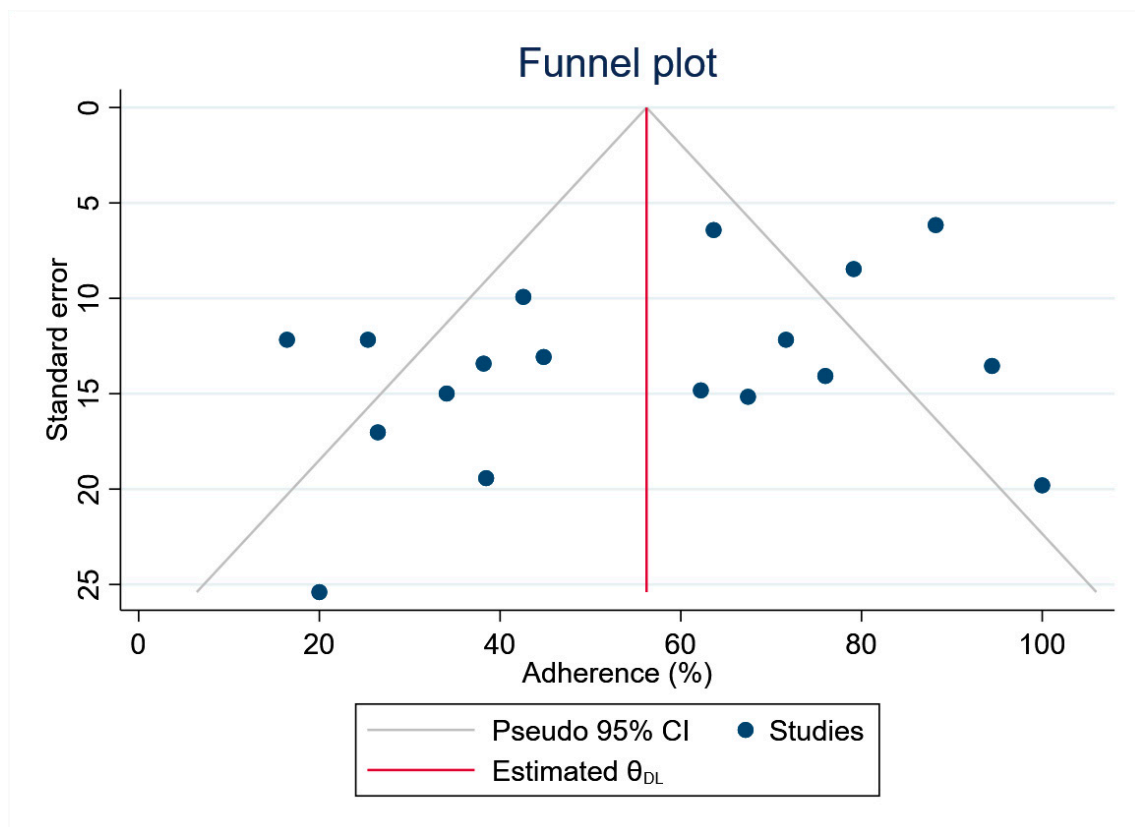

**Figure S1.** Funnel plot.

**Table S1.** Search strategy.

|                                                                                                                                                                                                                                                                                                                                                                                                                                                                                                                                                                                                                                                                                                                                                                        |
|------------------------------------------------------------------------------------------------------------------------------------------------------------------------------------------------------------------------------------------------------------------------------------------------------------------------------------------------------------------------------------------------------------------------------------------------------------------------------------------------------------------------------------------------------------------------------------------------------------------------------------------------------------------------------------------------------------------------------------------------------------------------|
| Databases searched until 08th December 2022.                                                                                                                                                                                                                                                                                                                                                                                                                                                                                                                                                                                                                                                                                                                           |
| <p>Strategy for Web of Science:</p> <p>Final search: TS=((("Morisky Medication Adherence Scale") OR ("MMAS-4") OR ("MMAS-8") OR ("Morisky Green Levine") OR ("Morisky Green Levine Medication Adherence Scale") OR ("Medication Adherence Questionnaire")) AND (("rare diseases") OR ("narcolepsy") OR ("Primary biliary cholangitis") OR ("fabry disease") OR ("cystic fibrosis") OR ("hemophilia A") OR ("hemophilia B") OR ("Sickle Cell Disease") OR ("Myasthenia Gravis") OR ("Idiopathic Pulmonary Fibrosis") OR ("Pulmonary arterial hypertension") OR ("Wilson's disease")))) (No limitations were used).</p>                                                                                                                                                  |
| <b>Results: 17</b>                                                                                                                                                                                                                                                                                                                                                                                                                                                                                                                                                                                                                                                                                                                                                     |
| <p>Strategy for PubMed: ("Morisky Medication Adherence Scale"[All Fields] OR "MMAS-4"[All Fields] OR "MMAS-8"[All Fields] OR "Morisky Green Levine Medication Adherence Scale"[All Fields] OR "Morisky Green Levine"[All Fields] OR "Medication Adherence Questionnaire"[All Fields]) AND ("rare diseases"[All Fields] OR "narcolepsy"[All Fields] OR "Primary biliary cholangitis"[All Fields] OR "fabry disease"[All Fields] OR "cystic fibrosis"[All Fields] OR "hemophilia A"[All Fields] OR "hemophilia B"[All Fields] OR "Sickle Cell Disease"[All Fields] OR "Myasthenia Gravis"[All Fields] OR "Idiopathic Pulmonary Fibrosis"[All Fields] OR "Pulmonary arterial hypertension"[All Fields] OR "Wilson's disease"[All Fields]) (No limitations were used).</p> |
| <b>Results: 12</b>                                                                                                                                                                                                                                                                                                                                                                                                                                                                                                                                                                                                                                                                                                                                                     |
| <p>Strategy for SCOPUS: ( ( "Morisky Medication Adherence Scale" ) OR ( "MMAS-4" ) OR ( "MMAS-8" ) OR ( "Morisky Green Levine Medication Adherence Scale" ) OR ( "Morisky Green Levine" ) OR ( "Medication Adherence Questionnaire" ) ) AND ( ( "rare diseases" ) OR ( "narcolepsy" ) OR ( "Primary biliary cholangitis" ) OR ( "fabry disease" ) OR ( "cystic fibrosis" ) OR ( "hemophilia A" ) OR ( "hemophilia B" ) OR ( "Sickle Cell Disease" ) OR ( "Myasthenia Gravis" ) OR ( "Idiopathic Pulmonary Fibrosis" ) OR ( "Pulmonary arterial hypertension" ) OR ( "Wilson disease" ) ) (No limitations were used).</p>                                                                                                                                               |
| <b>Results: 21</b>                                                                                                                                                                                                                                                                                                                                                                                                                                                                                                                                                                                                                                                                                                                                                     |
| <p>Strategy for Cochrane: (((("Morisky Medication Adherence Scale") OR ("MMAS-4") OR ("MMAS-8") OR ("Morisky Green Levine Medication Adherence Scale") OR ("Morisky Green Levine") OR ("Medication Adherence Questionnaire")) AND (("rare diseases") OR ("narcolepsy") OR ("Primary biliary cholangitis") OR ("fabry disease") OR ("cystic fibrosis") OR ("hemophilia A") OR ("hemophilia B") OR ("Sickle Cell Disease") OR ("Myasthenia Gravis") OR ("Idiopathic Pulmonary Fibrosis") OR ("Pulmonary arterial hypertension") OR ("Wilson disease"))):ti,ab,kw</p>                                                                                                                                                                                                     |
| <b>Results: 4</b>                                                                                                                                                                                                                                                                                                                                                                                                                                                                                                                                                                                                                                                                                                                                                      |

**Table S2.** Risk of bias.

[illegible]
